# Supplementary material for: RORγt-Raftlin1 complex regulates the pathogenicity of Th17 cells and colonic inflammation
Source: PubMed Central journal article supplement (PMC10435467; doi:10.1038/s41467-023-40622-1), 2023-08-17

## **Supplementary Information**

### **ROR $\gamma$ t-Raftlin1 complex regulates the pathogenicity of Th17 cells and colonic inflammation.**

Amir Kumar Singh<sup>1,2,3</sup>, Ritesh Kumar<sup>1,2,3</sup>, Jianyi Yin<sup>1</sup>, John F. Brooks<sup>2</sup>, Mahesh Kathania<sup>1,2,3</sup>, Sandip Mukherjee<sup>1,2,3</sup>, Jitendra Kumar<sup>1,2,3</sup>, Kevin P. Conlon<sup>4</sup>, Venkatesha Basrur<sup>4</sup>, Zhe Chen<sup>5</sup>, Xianlin Han<sup>6</sup>, Lora V. Hooper<sup>2,7</sup>, Ezra Burstein<sup>1</sup>, and K Venuprasad<sup>1,2,3</sup>

#### **Contents**

Supplementary Figures 1-9

Supplementary tables 1-3

Uncropped western blots and PCR agarose gels of Supplementary figures

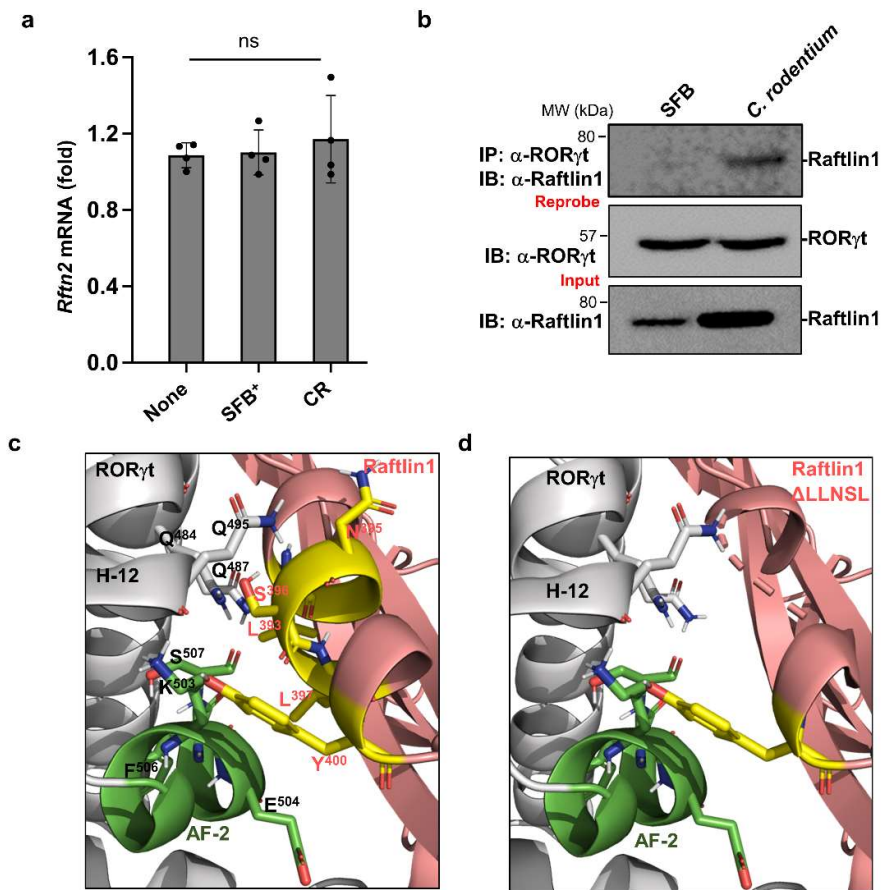

**Supplementary Fig. 1: ROR $\gamma$ t interacts with Raftlin1.** **a**, Expression of *Rftn2* in CD4<sup>+</sup> T cells isolated from colonic lamina propria of *C. rodentium* infected, SFB colonized, and uninfected WT mice; n=4 mice per group, p=0.51. **b**, Immunoassay in the lysates of CD4<sup>+</sup> T cells isolated from colonic lamina propria of *C. rodentium* infected and SFB colonized WT mice were subjected to immunoprecipitation with anti-ROR $\gamma$ t antibody and immunoblot analysis with anti-Raftlin1 or anti-ROR $\gamma$ t antibody. Immunoblots are from one experiment representative of three independent experiments with similar results. **c**, The LBD domain of ROR $\gamma$ t (PDB: 5X8U) and Raftlin1 (AlphaFold2 predicted structure) are docked using HADDOCK2.4. The docked interface is shown as a cartoon diagram. The LLNSL motif of Raftlin1 makes non-covalent interaction with the AF2 domain and  $\alpha$ -helix 12 of ROR $\gamma$ t. The amino acids involved in non-covalent interactions are shown in the stick model. ROR $\gamma$ t Helix-12 is shown in color grey, AF2 domain in color green, Raftlin1 in color salmon, and LLNSL motif of Raftlin1 in color yellow. **d**,

the protein-protein interface between ROR $\gamma$ t and Raftlin1 is disrupted after deletion of the LLNSL motif in Raftlin1. Statistical significance (a) was determined by unpaired Student's t-test (two-tailed) with  $p < 0.05$  considered statistically significant. ns- not significant, error bars are mean $\pm$ SD. Source data are provided as a Source data file.

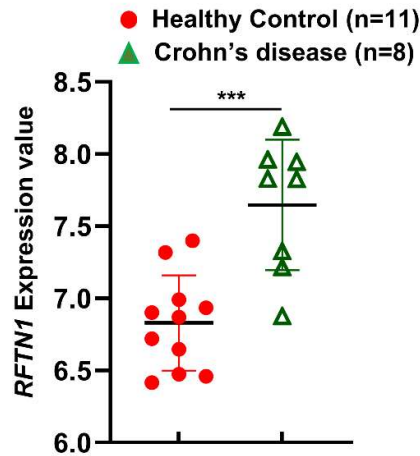

**Supplementary Fig. 2: Raftlin1 expression in Crohn's disease patients.** GEO dataset (GSE59071) was analyzed, and the normalized expression value of *RFTN1* is shown (n=11 healthy control and n=8 Crohn's disease patient's samples, p=0.0003). Statistical significance was determined by unpaired Student's t-test (two-tailed) with  $p < 0.05$  considered statistically significant. \*\*\* $p < 0.001$ , error bars are mean $\pm$ SD. Source data are provided as a Source data file.

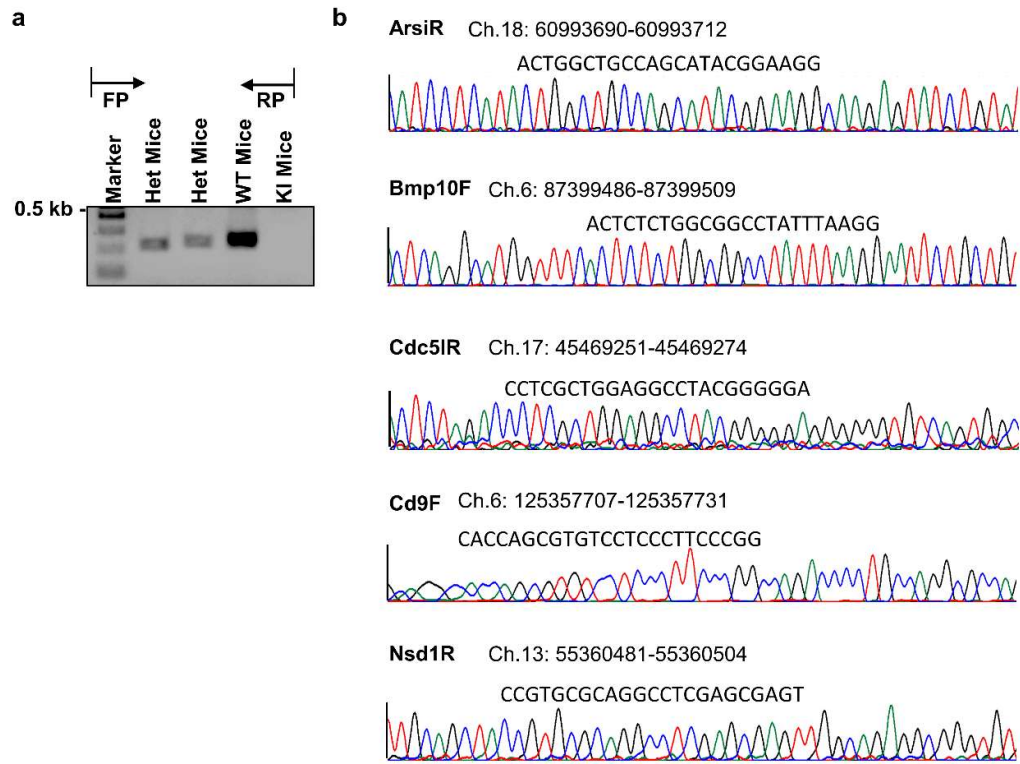

**Supplementary Fig. 3: Genotyping and off-target gRNA analysis in the *Raftlin1*<sup>ΔLNSL</sup> mice.** **a**, Genotyping of *Raftlin1*<sup>ΔLNSL</sup> mice by PCR. **b**, Representative Sanger sequencing chromatograms to check the potential off-target sites of gRNA in *Raftlin1*<sup>ΔLNSL</sup> mice. No off-target cleavage sites were detected.

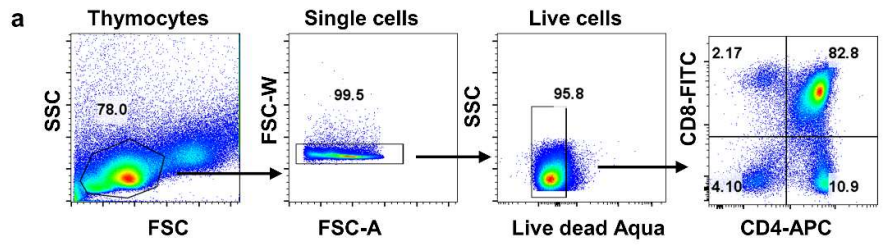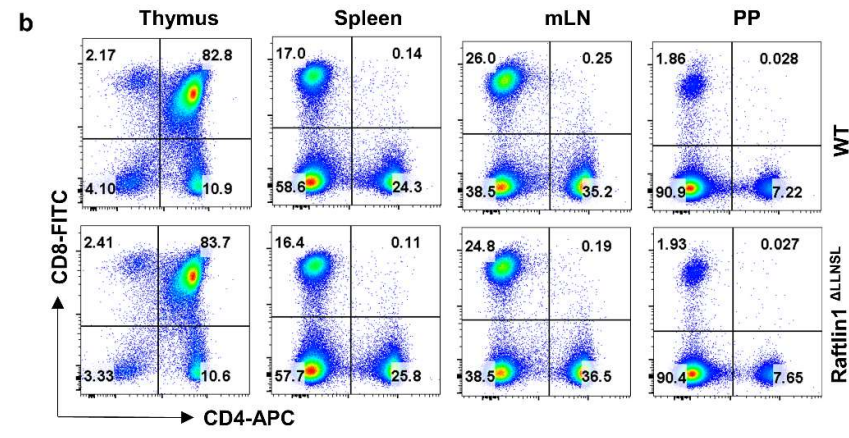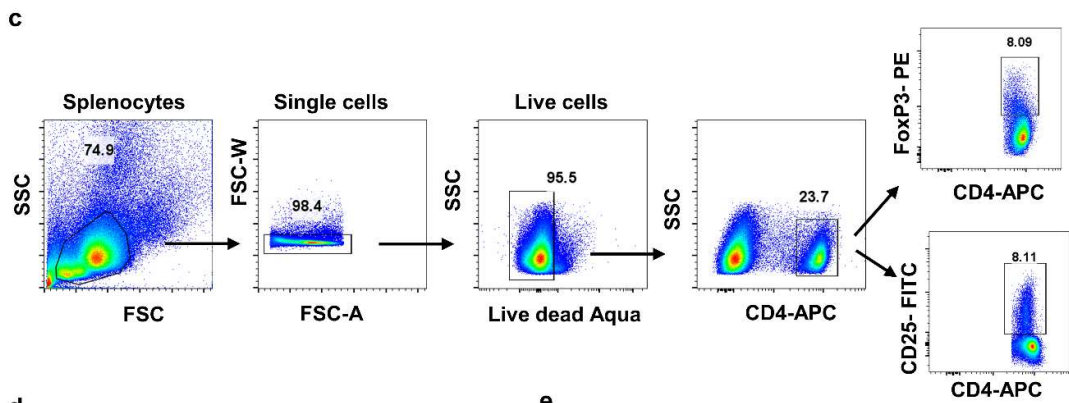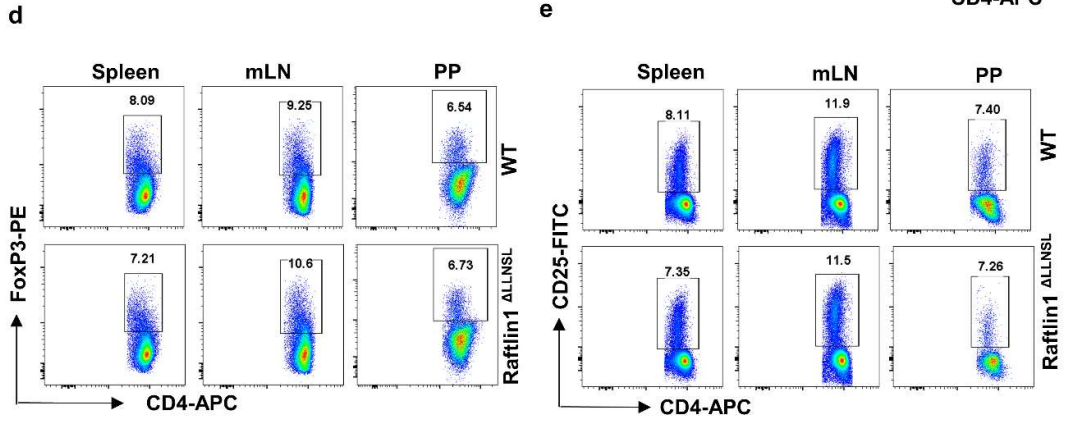

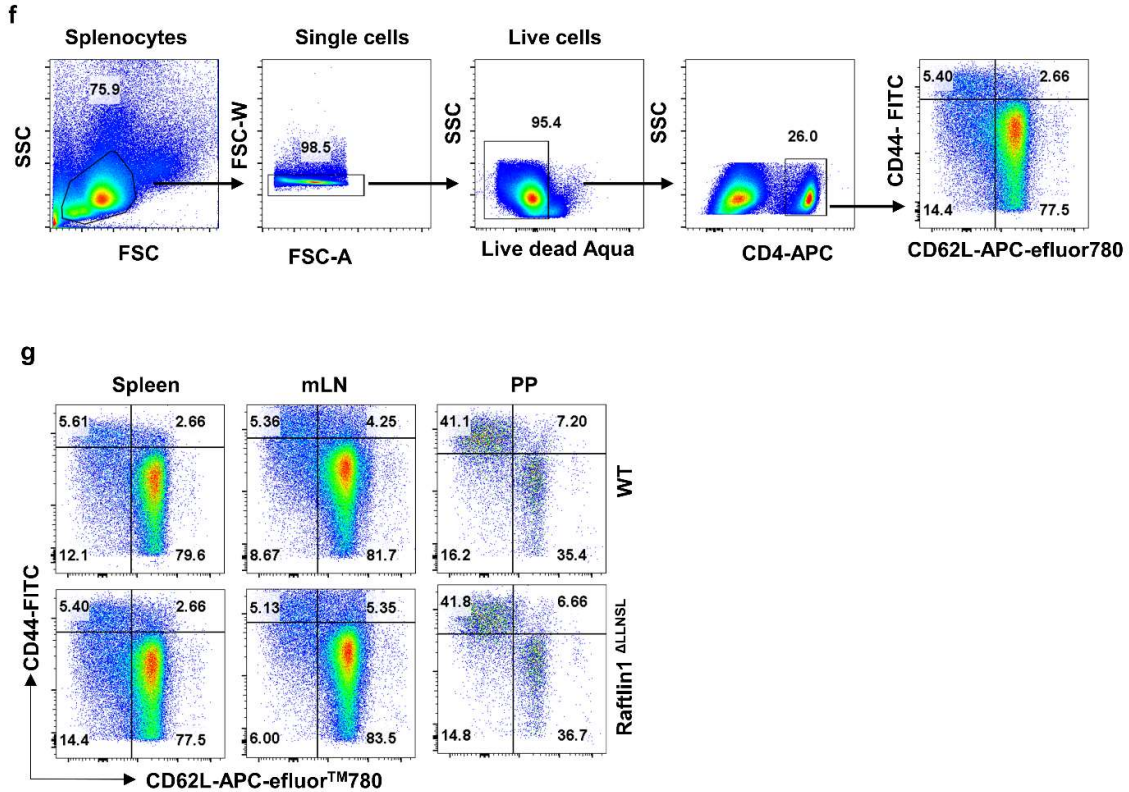

**Supplementary Fig. 4: Flow cytometric analysis of T cells in the spleen, mesenteric lymph node (mLN), Peyer's patches (PP), and thymus of WT and *Raf<sup>flin1</sup><sup>ALLNSL</sup>* mice. a,** Gating strategy of cells from thymus of WT and *Raf<sup>flin1</sup><sup>ALLNSL</sup>* mice stained with Live-Dead Aqua, anti-CD4, and anti-CD8 antibodies. **b,** Representative images of cells from thymus, spleen, mLN, and PP of WT and *Raf<sup>flin1</sup><sup>ALLNSL</sup>* mice were stained with antibodies against CD4 and CD8 and analyzed by flow cytometry. **c,** Gating strategy of cells from the spleen of WT and *Raf<sup>flin1</sup><sup>ALLNSL</sup>* mice stained with Live-Dead Aqua, anti-CD4, anti-FoxP3, and anti-CD25 antibodies. **d-e,** Representative image of cells from spleen, mLN, and PP of WT and *Raf<sup>flin1</sup><sup>ALLNSL</sup>* mice were stained with antibodies against CD4, FoxP3 and CD25, and analyzed by flow cytometry. **f,** Gating strategy of cells from the spleen of WT and *Raf<sup>flin1</sup><sup>ALLNSL</sup>* mice stained with Live-Dead Aqua, anti-CD4, anti-CD44, and anti-CD62L antibodies. **g,** Representative image of cells from spleen, mLN, and PP of WT and *Raf<sup>flin1</sup><sup>ALLNSL</sup>* mice stained with antibodies against CD4, CD44, and CD62L, and analyzed by flow cytometry. b, d, e, g n=5 mice per group.



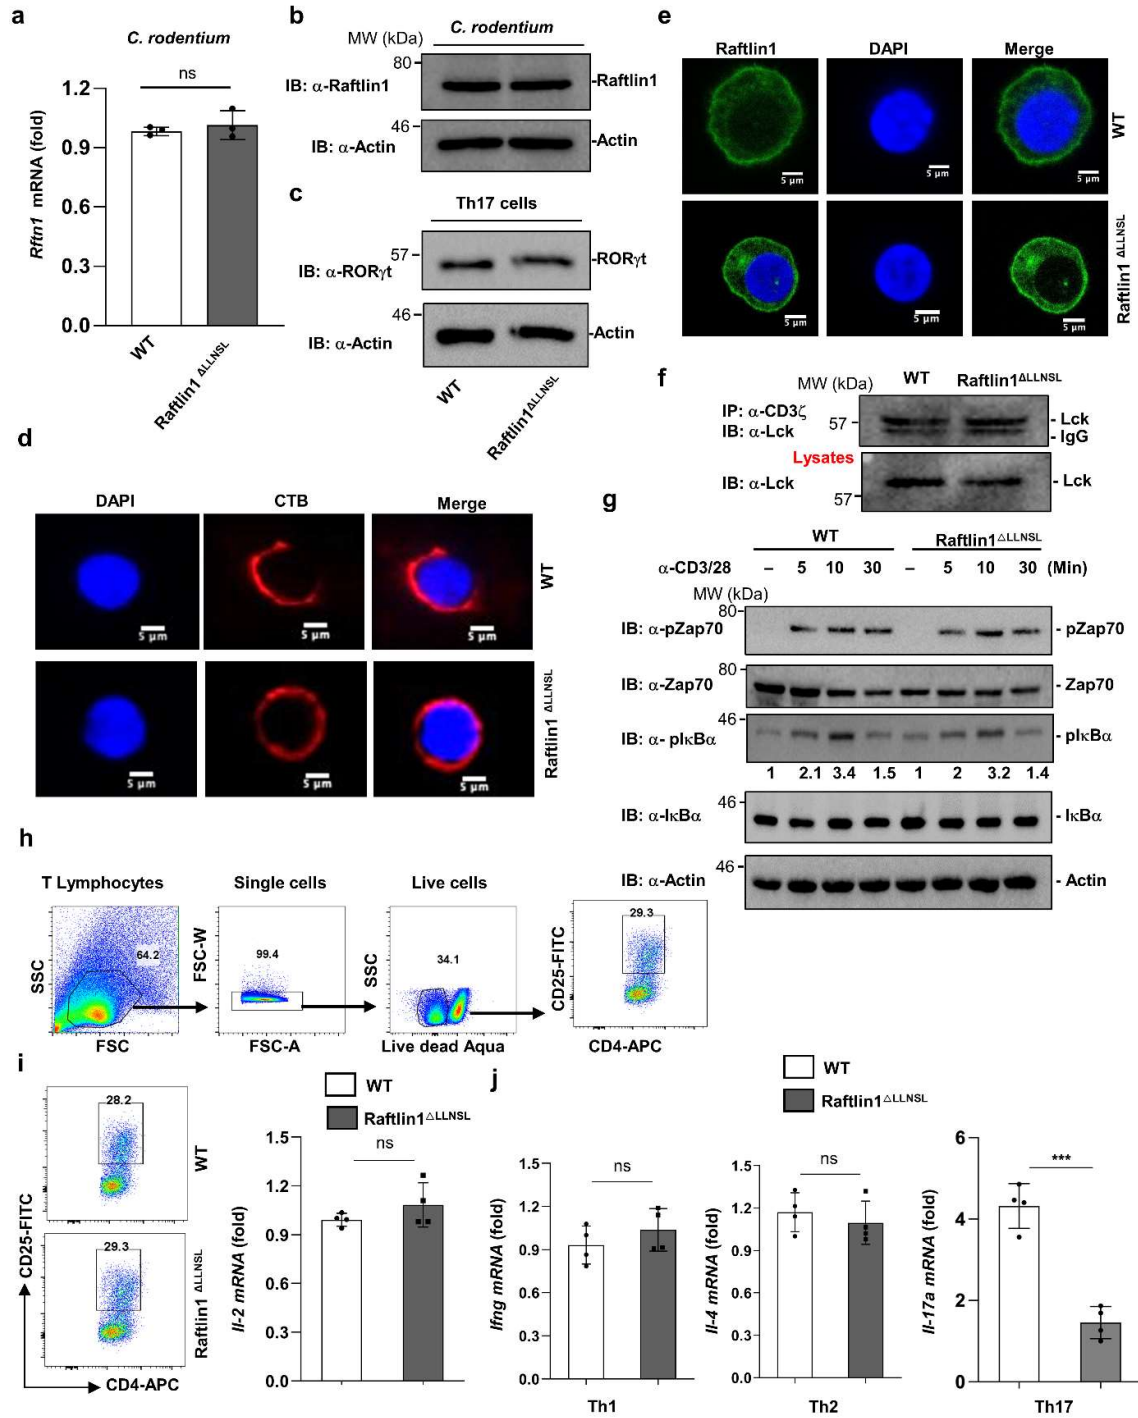

**Supplementary Fig. 5: Lipid raft composition and TCR signaling in *Raftlin1*<sup>ALLNSL</sup> T cells.**

**a-b**, Expression of *Raftlin1* in *C. rodentium* infected WT and *Raftlin1*<sup>ALLNSL</sup> mice by real-time PCR and western blotting, respectively.  $n = 3$  mice per group,  $p = 0.508$ . **c**, Expression of *ROR $\gamma$ t* in WT and *Raftlin1*<sup>ALLNSL</sup> Th17 cells. **d**, *CD4*<sup>+</sup> T cells were purified from WT and *Raftlin1*<sup>ALLNSL</sup>



mice and stimulated with anti-CD3 and anti-CD28 antibodies for 48 hours. The membrane GM1 was stained with cholera toxin B (CTB) to check lipid raft formation by microscopy. The image is representative of three independent experiments. Scale bars, 5  $\mu$ m. **e**, Confocal microscopy analysis of the localization of Raftlin1 in WT and Raftlin1<sup>ALLNSL</sup> in CD4<sup>+</sup> T cells. The image is representative of three independent experiments. Scale bars, 5  $\mu$ m. **f**, Lysates of activated CD4<sup>+</sup> T cells were isolated from WT and Raftlin1<sup>ALLNSL</sup> mice, immunoprecipitated with anti-CD3 $\zeta$  antibody, and immunoblotted with anti-Lck antibody. **g**, CD4<sup>+</sup> T cells from WT and Raftlin1<sup>ALLNSL</sup> mice were stimulated with anti-CD3/anti-CD28 antibody for the indicated time. The cell lysates were prepared and analyzed by immunoblot with the indicated antibodies. **h**, Gating strategy for flow cytometry of CD4<sup>+</sup> T cells from WT and Raftlin1<sup>ALLNSL</sup> mice stained with Live-Dead Aqua, anti-CD4, and anti-CD25 antibodies. **i**, Expression of CD25 and *Il-2* on activated CD4<sup>+</sup> T cells from WT and Raftlin1<sup>ALLNSL</sup> mice; n=4 mice per group, p=0.244. **j**, CD4<sup>+</sup> T cells isolated from WT and Raftlin1<sup>ALLNSL</sup> mice and differentiated under Th1, Th2 and Th17 polarizing conditions. The expression of *Ifng*, *Il-4*, and *Il-17a* was analyzed by real-time PCR; n=4 mice per group, p=0.327 (*Ifng*), p=0.494 (*Il-4*), p=0.0001 (*Il-17a*). **b**, **c**, **f**, **g** Immunoblots are from one experiment representative of three independent experiments with similar results. Statistical significance was determined by unpaired Student's t-test (two-tailed) in **a**, **i**, **j** with p < 0.05 considered statistically significant. \*\*\*p < 0.001, ns- not significant, error bars are mean $\pm$ SD. Source data are provided as a Source data file.

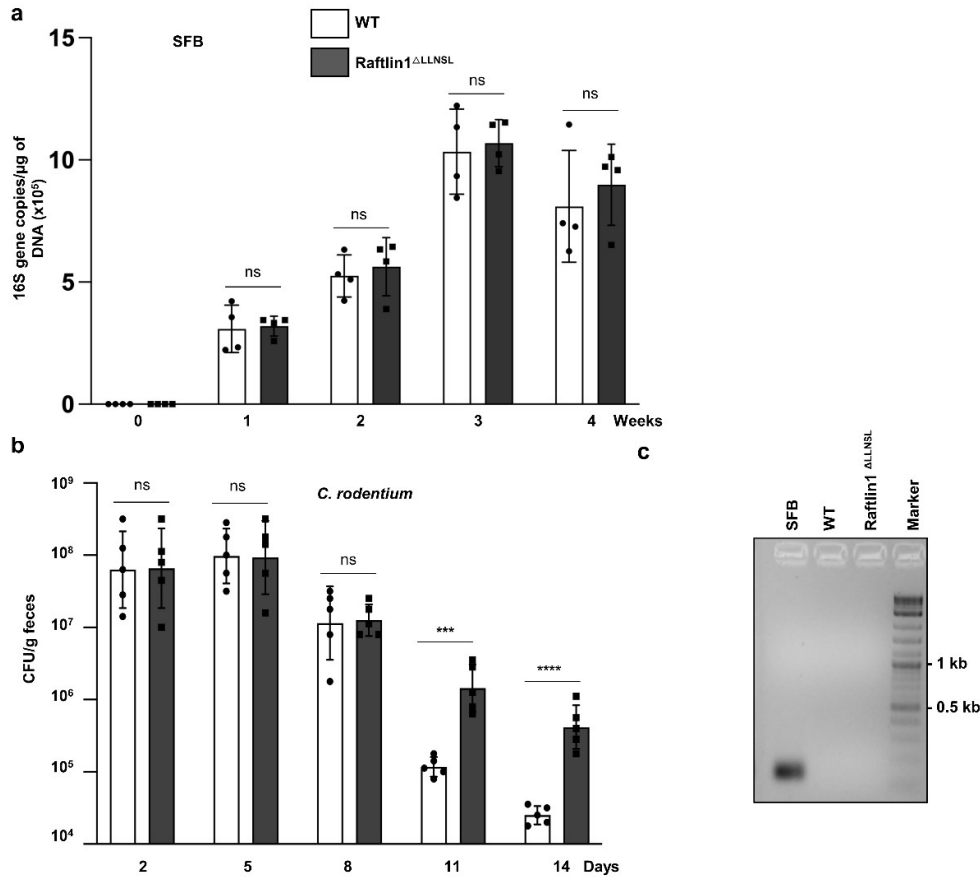

**Supplementary Fig. 6: Analysis of SFB colonization and *C. rodentium* load in WT and Raftlin1<sup>ΔLLNSL</sup> mice.** **a**, Relative abundance of SFB in the feces of WT and Raftlin1<sup>ΔLLNSL</sup> mice after gavage of feces from SFB monocolonized mice by quantifying SFB specific 16S using real-time PCR; n=4 biologically independent mice; p=0.83 (week 1), p=0.62 (week 2), p=0.74 (week 3), p=0.55 (week 4) **b**, Quantification of *C. rodentium* loads (CFU/g) in the stool of WT and Raftlin1<sup>ΔLLNSL</sup> mice after the indicated time of the post-infection; n=5 mice per group; p=0.95 (day 2), p=0.94 (day 5), p=0.87 (day 8), p=0.0001 (day 11), p=0.00003 (day 14). **c**, the absence of SFB in our mice colony was confirmed by PCR using SFB-specific 16s primers. Data are from one experiment representative of three independent experiments with similar results. **a**, **b** Statistical significance was determined by unpaired Student's t-test (two groups) with p < 0.05 considered statistically significant. \*\*\*p < 0.001, \*\*\*\*p < 0.0001, ns- not significant, error bars are mean±SD. Source data are provided as a Source data file.

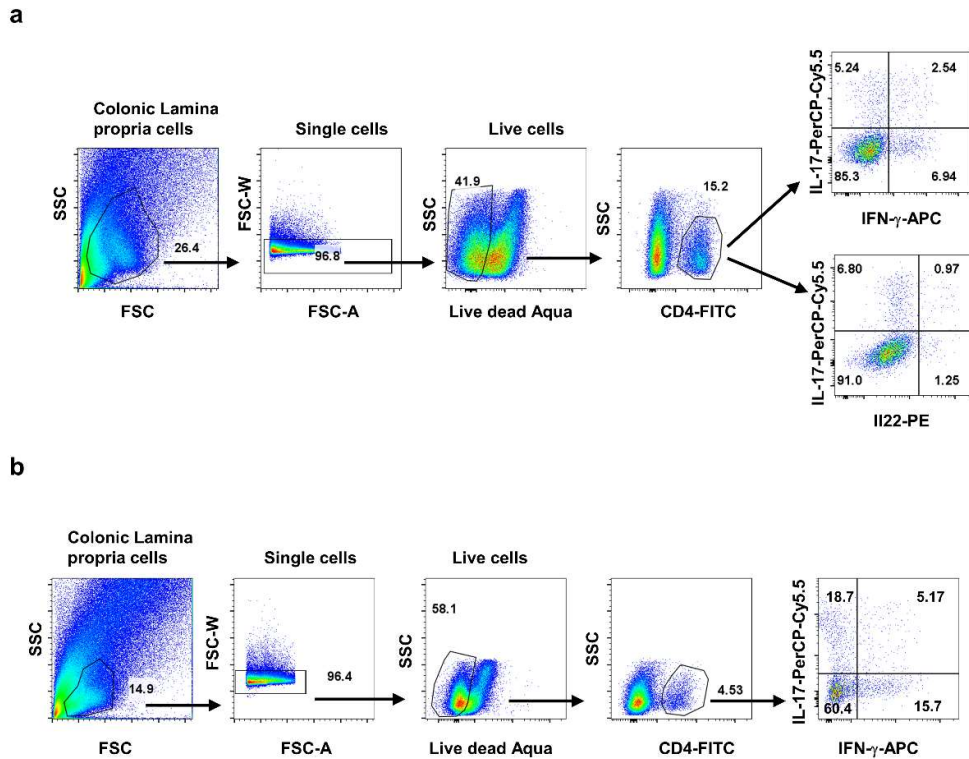

**Supplementary Fig. 7: Flow cytometry gating strategy for the analysis of IL-17, IL-22, and IFN- $\gamma$  in CD4<sup>+</sup> T cells of colonic lamina propria cells (Fig. 3e, f, 4g). **a**, Gating strategy of colonic lamina propria cells from WT and Raftlin1 <sup>$\Delta$ LLNSL</sup> mice stained with Live-Dead Aqua, anti-CD4, anti-IL-17, anti-IL22, and anti-IFN- $\gamma$  antibodies, and analyzed by flow cytometry. **b**, Gating strategy of colonic lamina propria cells from Rag1<sup>-/-</sup> mice adoptively transferred CD4<sup>+</sup>CD25<sup>-</sup>CD45RB<sup>hi</sup> cells from WT and Raftlin1 <sup>$\Delta$ LLNSL</sup> mice stained with Live-Dead Aqua, anti-CD4, anti-IL-17 and anti-IFN- $\gamma$  antibodies and analyzed by flow cytometry. Data are from one experiment representative of three independent experiments with similar results.**

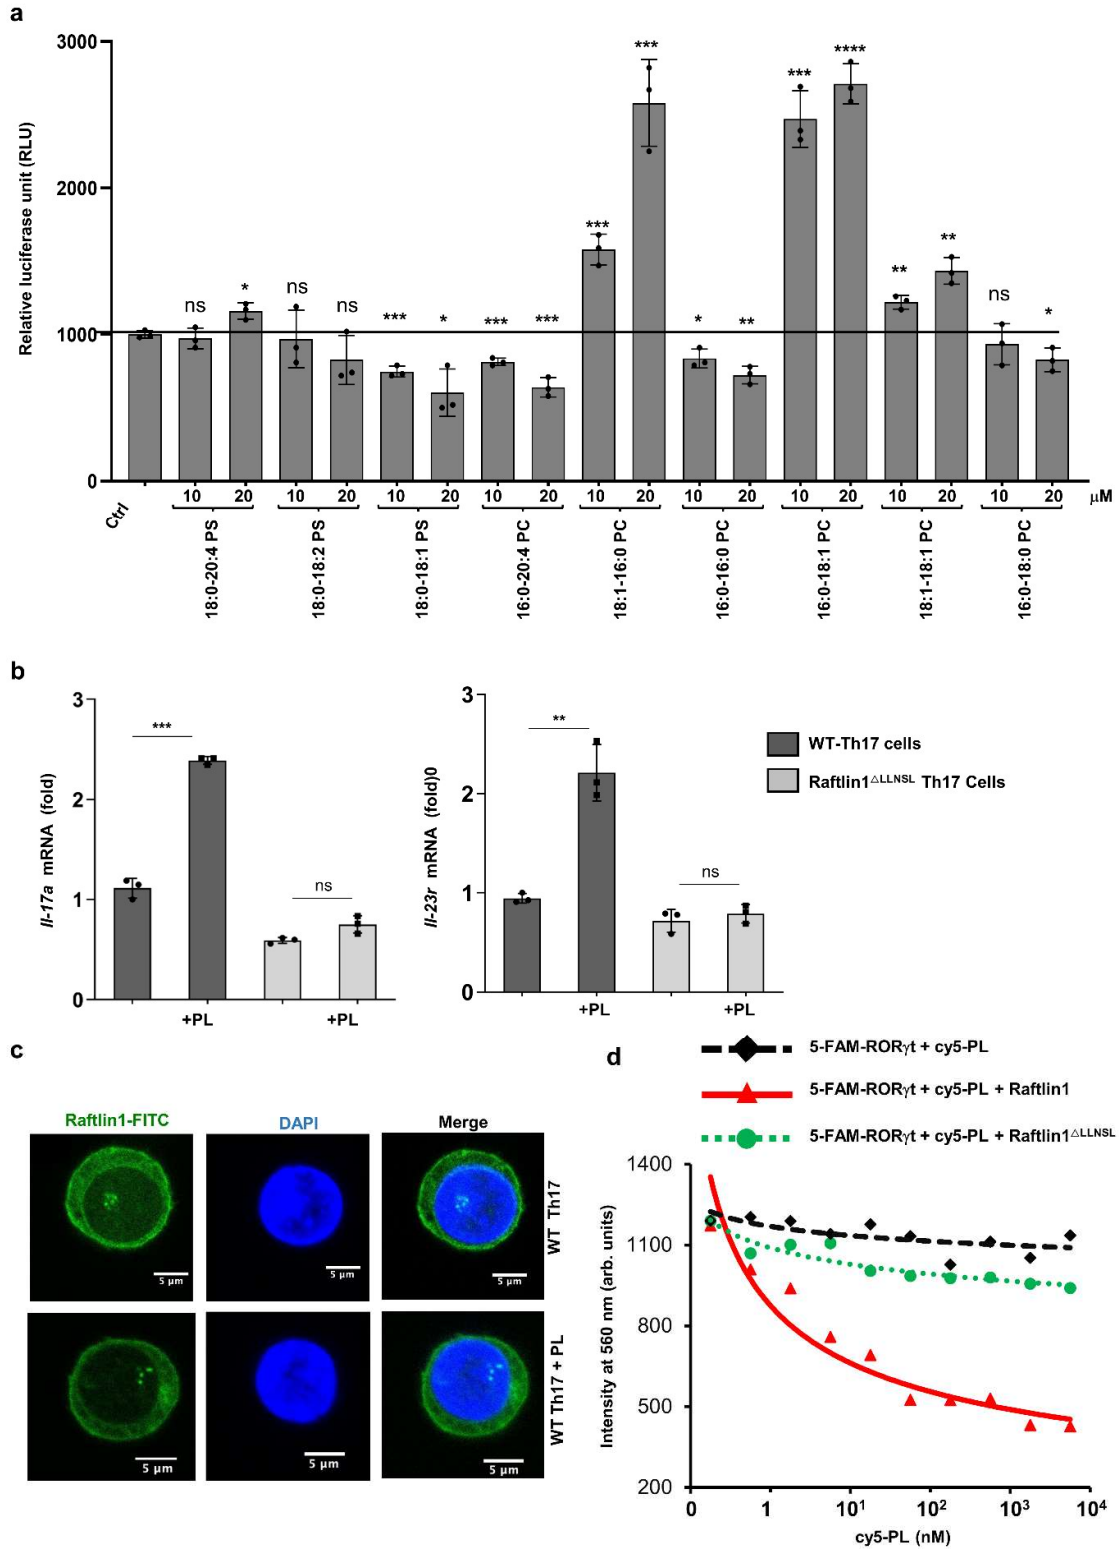

**Supplementary Fig. 8: IL-17 promoter-luciferase reporter activity induced by lipids in Th17 cells.** **a**, Jurkat T cells were cultured in lipid-depleted conditional media and transfected

with various combinations (below plot) of IL-17-promoter-driven luciferase plasmid (pGL4-mIL17p), the plasmid encoding Flag-ROR $\gamma$ t along with Raftlin1 and cultured in the presence of various lipids (10 $\mu$ M or 20 $\mu$ M) for 16 h. The relative luciferase activity was measured to quantify the ROR $\gamma$ t transcriptional activity. Results are presented in relative luciferase units (RLU). n= 3 biological replicates; (18:0-20:4 PS, 10 $\mu$ M p=0.57, 20 $\mu$ M p= 0.01), (18:0-18:2 PS, 10 $\mu$ M p=0.80, 20 $\mu$ M p= 0.15), (18:0-18:1 PS, 10 $\mu$ M p=0.0007, 20 $\mu$ M p= 0.014), (16:0-20:4 PS, 10 $\mu$ M p=0.0009, 20 $\mu$ M p= 0.0009), (18:1-16:0 PS, 10 $\mu$ M p=0.0008, 20 $\mu$ M p= 0.0008), (16:0-18:1 PS, 10 $\mu$ M p=0.0002, 20 $\mu$ M p<0.0001), (18:1-18:1 PS, 10 $\mu$ M p=0.002, 20 $\mu$ M p= 0.0014), (16:0-18:0 PS, 10 $\mu$ M p=0.46, 20 $\mu$ M p= 0.02). **b**, Naive CD4<sup>+</sup> T cells were isolated from WT or Raftlin1<sup>ALLNSL</sup> mice and differentiated under Th17 polarizing conditions followed by the addition of phospholipids (PL) 18:1-16:0-PC, 16:0-18:1-PC, and 18:1-18:1-PC at 48 h in lipid-depleted fresh media. The expression of *Il-17a* and *Il-23r* was measured by real-time PCR at 96 h. n= 3 biological replicates; p=0.00003 (*Il-17a*), p=0.0016 (*Il-23r*). **c**, Localization of Raftlin1 in WT Th17 cells cultured in the presence or absence of phospholipid by confocal microscopy. The image is representative of three independent experiments. Scale bars, 5  $\mu$ m. **d**, Fluorescence emission intensity of 5-FAM labeled ROR $\gamma$ t (5-FAM-ROR $\gamma$ t) at 520 nm (Excitation = 470 nm) at increasing concentration of Cy5 labeled phospholipids (Cy5-PL) in the presence of GST-Raftlin1 (red triangles), GST-Raftlin1<sup>ALLNSL</sup> (green dots), and control GST only (black dots). The concentrations of Cy5-PL (0-10<sup>4</sup> nM), 5-FAM-ROR $\gamma$ t (5 nM), GST-Raftlin1 (10 nM), and GST-Raftlin1<sup>ALLNSL</sup> (10 nM) were used. Data are from one experiment representative of three independent experiments with similar results. **a**, **b** Statistical significance was determined by unpaired Student's t-test (two-tailed) with p < 0.05 considered statistically significant. \*p < 0.05, \*\*p < 0.01, \*\*\*p < 0.001, \*\*\*\*p < 0.0001, ns- not significant, error bars are mean $\pm$ SD. Source data are provided as a Source data file.

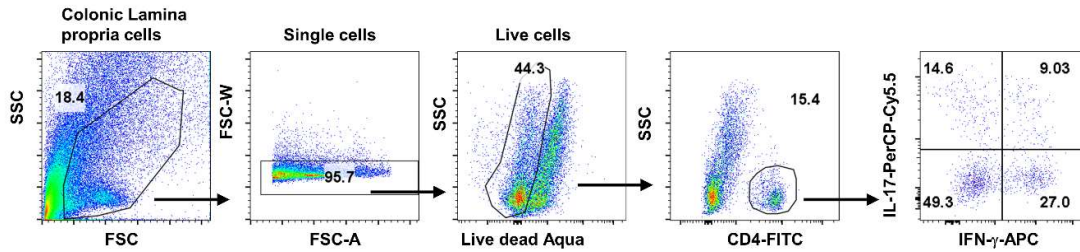

**Supplementary Fig. 9: Flow cytometry gating strategy for the analysis of IL-17 and IFN- $\gamma$  in CD4<sup>+</sup> T cells of colonic lamina propria cells (Fig. 5h).** Gating strategy of colonic lamina propria cells from *Rag1*<sup>-/-</sup> mice adoptively transferred phospholipid treated Th17 cells from WT and *Raftlin1* <sup>$\Delta$ LLNSL</sup> mice stained with Live-Dead Aqua, anti-CD4, anti-IL-17, and anti-IFN- $\gamma$  antibodies, and analyzed by flow cytometry. Data are from one experiment representative of three independent experiments with similar results.

**Supplementary Table 1:** List of lipids detected in Raftlin1 and ROR $\gamma$ t immunoprecipitated samples from *C. rodentium* infected WT mice:

| <b>S. No</b> | <b>Lipids</b>                                                                   | <b>IP: <math>\alpha</math>-Raftlin1 (pmol/mg)</b> | <b>IP: <math>\alpha</math>-ROR<math>\gamma</math>t (pmol/mg)</b> | <b>IP: IgG</b> |
|--------------|---------------------------------------------------------------------------------|---------------------------------------------------|------------------------------------------------------------------|----------------|
| 1            | 1-stearoyl-2-arachidonoyl-sn-glycero-3-phospho-L-serine ( <b>16:0-20:4-PS</b> ) | 56.41                                             | 50.93                                                            | 0              |
| 2            | 1-stearoyl-2-linoleoyl-sn-glycero-3-phospho-L-serine ( <b>18:0-18:2-PS</b> )    | 32.78                                             | 16.42                                                            | 0              |
| 3            | 1-stearoyl-2-oleoyl-sn-glycero-3-phospho-L-serine ( <b>18:0-18:1-PS</b> )       | 21.68                                             | 4.25                                                             | 0              |
| 4            | 1-palmitoyl-2-arachidonoyl-sn-glycero-3-phosphocholine ( <b>16:0-20:4-PC</b> )  | 40.39                                             | 21.14                                                            | 0              |
| 5            | 1-oleoyl-2-palmitoyl-sn-glycero-3-phosphocholine ( <b>18:1-16:0-PC</b> )        | 27.06                                             | 8.69                                                             | 0              |
| 6            | 1,2-di-palmitoyl-sn-glycero-3-phosphocholine ( <b>16:0-16:0-PC</b> )            | 21.85                                             | 5.21                                                             | 0              |
| 7            | 1-Palmitoyl-2-oleoyl-sn-glycero-3-phosphocholine ( <b>16:0-18:1-PC</b> )        | 20.22                                             | 18.54                                                            | 0              |
| 8            | 1,2-dioleoyl-sn-glycero-3-phosphatidylcholine ( <b>18:1-18:1-PC</b> )           | 63.19                                             | 11.51                                                            | 0              |
| 9            | 1-palmitoyl-2-stearoyl-sn-glycero-3-phosphocholine ( <b>16:0-18:0-PC</b> )      | 20.22                                             | 18.54                                                            | 0              |



**Supplementary Table 2:** List of predicted Off-target genes

| S.No | Genes           | CFD Score |
|------|-----------------|-----------|
| 1    | <i>Ccl9</i>     | 0.63      |
| 2    | <i>Septin5</i>  | 0.13      |
| 3    | <i>Cd9</i>      | 0.09      |
| 4    | <i>Arsi</i>     | 0.09      |
| 5    | <i>Tcaf3</i>    | 0.09      |
| 6    | <i>Prx</i>      | 0.08      |
| 7    | <i>Bmp10</i>    | 0.06      |
| 8    | <i>Nsd1</i>     | 0.04      |
| 9    | <i>Cdc5l</i>    | 0.03      |
| 10   | <i>Prnp/Prn</i> | 0.01      |
| 11   | <i>Pdgfb</i>    | 0.00      |
| 12   | <i>Myo16</i>    | 0.00      |
| 13   | <i>Tns3</i>     | 0.00      |
| 14   | <i>Gdnf</i>     | 0.00      |
| 15   | <i>Kctd17</i>   | 0.00      |

**Supplementary Table 3: PCR primers sequence of the predicted off-target genes**

| S.no | Genes          | Primers                                                            |
|------|----------------|--------------------------------------------------------------------|
| 1    | <i>Ccl9</i>    | Fw:5'-CGTTTGATCCAGATCTTGAGGC-3'<br>Rv:5'-GGCTCAGCAGTTAAGAGCACTG-3' |
| 2    | <i>Septin5</i> | FW:5'-CCTCTTCTGCCTCGGGTTTT-3'<br>Rv:5'-CGGGTGAAGAGCAAGGAGAG-3'     |
| 3    | <i>Cd9</i>     | Fw:5'-AGCAATCTGTCACCTGGTTCG-3'<br>Rv:5'-CAGTCTGTGTAGCCCTTGGG-3'    |
| 4    | <i>Arsi</i>    | Fw:5'-TGATCACCAGCACACCAGTC-3'<br>Rv:5'-GGCCACCGACCATTGTTAGA-3'     |
| 5    | <i>Tcaf3</i>   | FW: 5'-TGGCAGAAGTTGTGGAAGAGG-3'<br>Rv:5'-CTGCACAGACGCTATAGGGG-3'   |
| 6    | <i>Prx</i>     | Fw:5'-CACTCGACCTCTCTGGCAAG-3'<br>Rv:5'-GGGCTGACTCCAAGATCTTGT-3'    |
| 7    | <i>Bmp10</i>   | Fw:5'-ACCTCGGAGTAGCACCCCTAG-3'<br>Rv:5'-GGGAGGGGAGAGTCTTCAGT-3'    |
| 8    | <i>Nsd1</i>    | Fw:5'-GCAGCAGCCATGTTTGTCAA-3'<br>Rv:5'-CGGGAAAAGTTCTCCAGGCT-3'     |
| 9    | <i>Cdc5l</i>   | Fw:5'-CAGATGGTTGGCTCAGTGGT-3'<br>Rv:5'-ATGGTGTCATCCCTCTGCAC-3'     |

Uncropped western blots and PCR agarose gels of Supplementary figures

Supplementary Fig. 1b

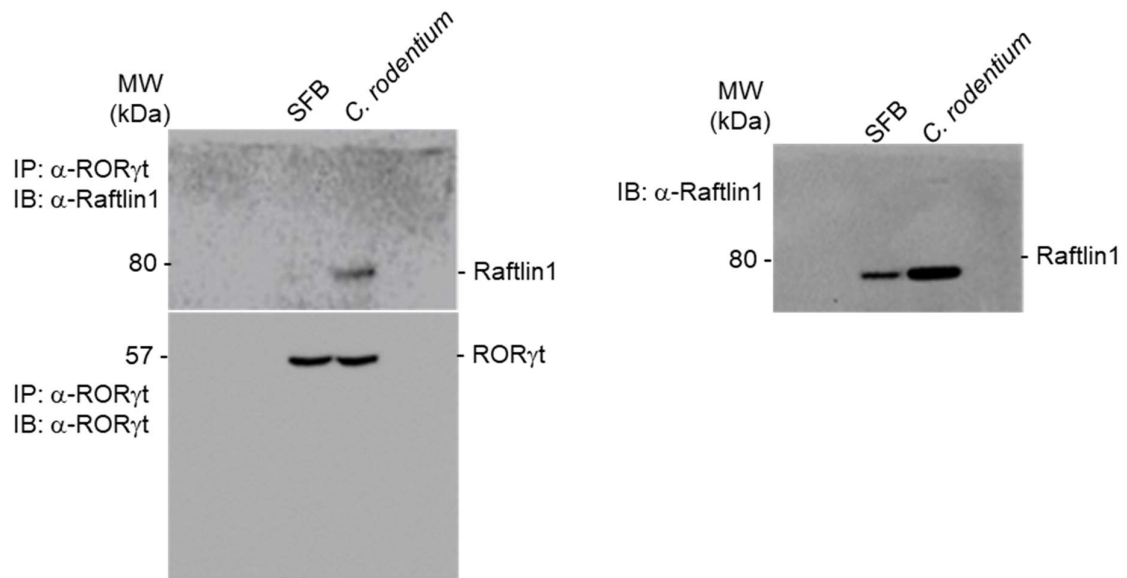

Supplementary Fig. 3a

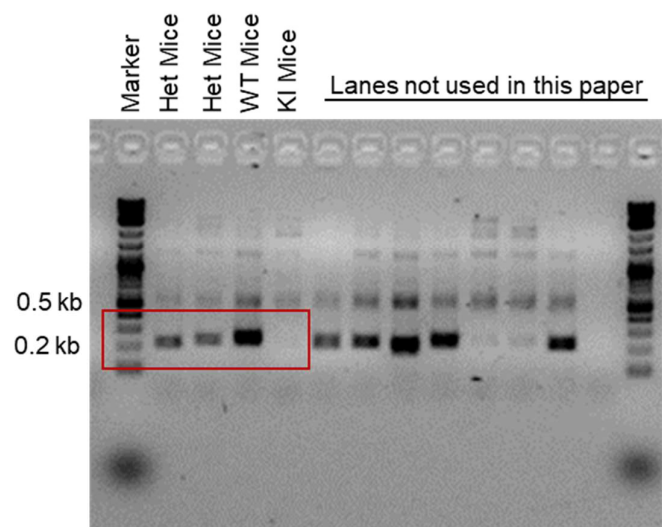

Supplementary Fig. 5b

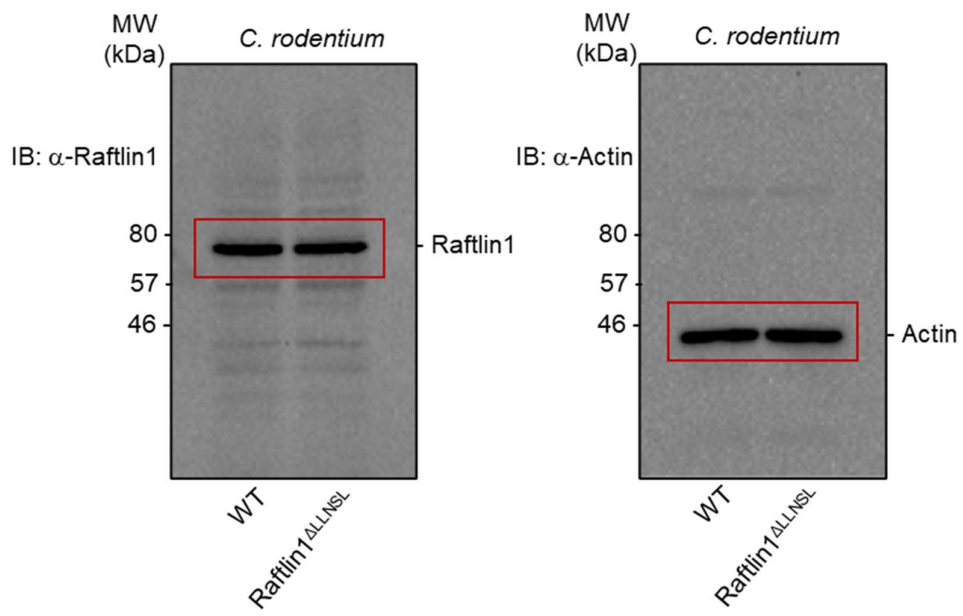

Supplementary Fig. 5c

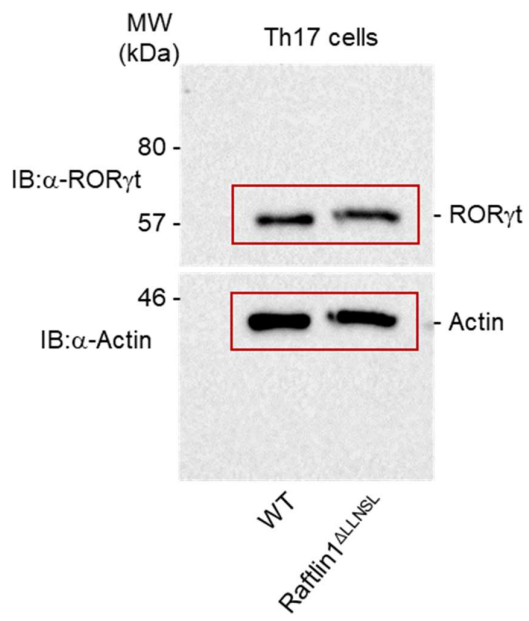

Supplementary Fig. 5f

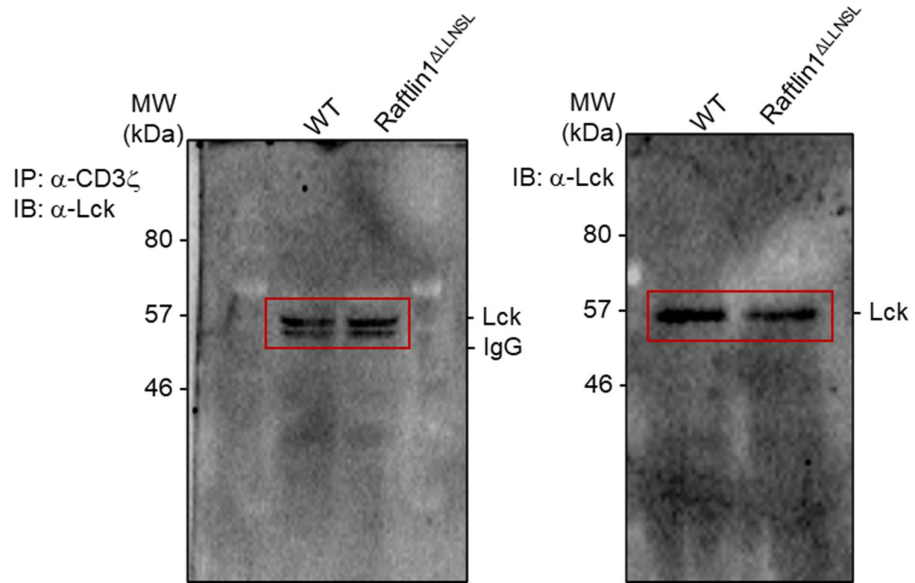



**Supplementary Fig. 5g**

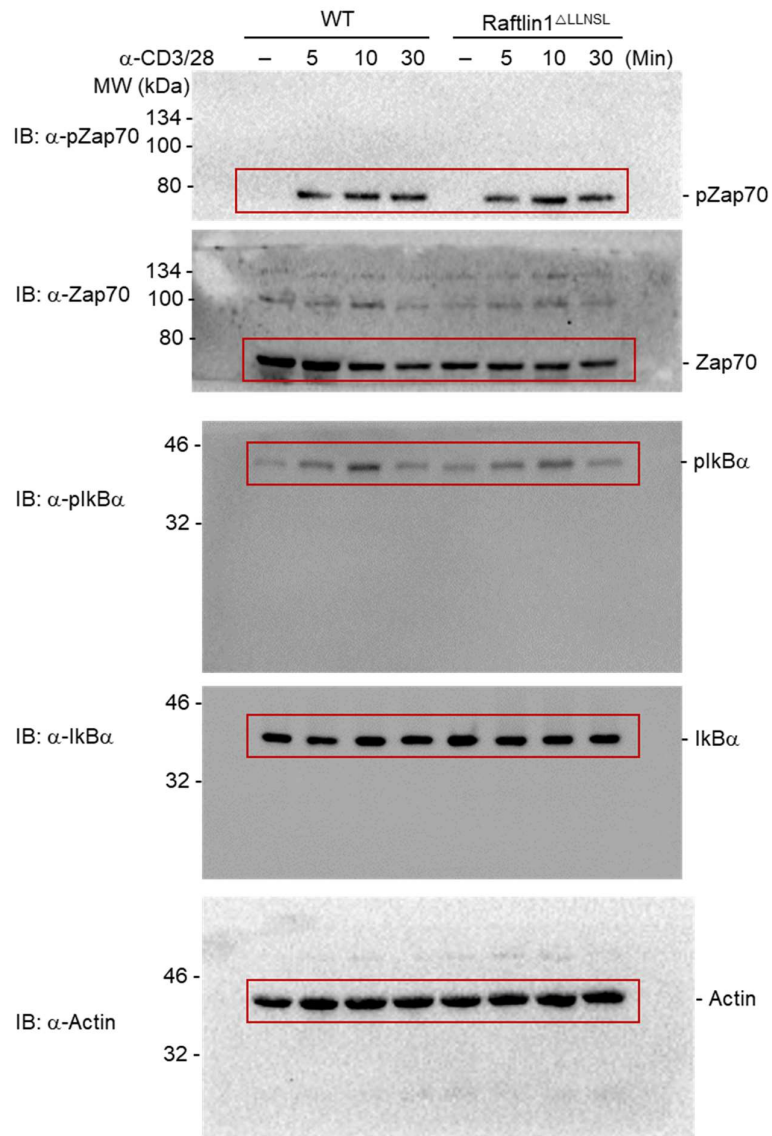

Supplement: 41467_2023_40622_MOESM1_ESM.pdf [file 41467_2023_40622_MOESM1_ESM.pdf]
